# Supplementary material
Source: publisher figshare collection journal article supplement (https://tandf.figshare.com/articles/dataset/_/7011812)

## Effects of sporidesmin on cultured biliary tract cells from Romney lambs that differed in their sensitivity to sporidesmin

GC Lindsay<sup>\*</sup>, CA Morris<sup>†</sup>, M Boucher<sup>\*‡</sup>, K Capundan<sup>‡</sup> and TW Jordan<sup>\*§</sup>

<sup>\*</sup>Centre for Biodiscovery and School of Biological Sciences, Victoria University of Wellington, PO Box 600, Wellington, New Zealand

<sup>†</sup>Deceased, formerly of Animal Genetics, AgResearch, Ruakura Research Centre, Private Bag 3123, Hamilton, New Zealand

<sup>‡</sup>School of Mathematics and Statistics, Victoria University of Wellington, PO Box 600, Wellington, New Zealand

<sup>§</sup>Current address: Drug Safety Research and Development, Pfizer Inc., Cambridge, Massachusetts, USA

<sup>§</sup>Author for correspondence: Email: bill.jordan@vuw.ac.nz

**Supplementary Figure 1. Representative gallbladder cell cultures after exposure to 1 µg/mL sporidesmin. Cultures from two resistant line animals (R5160, R5284) show some change at 1 hour and detachment of groups of cells at the periphery by 2 hours. Cultures from susceptible line animals S5069 and S5097 show major response to sporidesmin with substantial rounding up of cells by 1 hour and detachment of sheets of cells by 2 hours. Cultures from two unselected control line animals (C5233, C5241) show intermediate change, compared to resistant and susceptible lines, at 1 hour with rounding up and partial detachment of cells at the periphery of monolayers.**

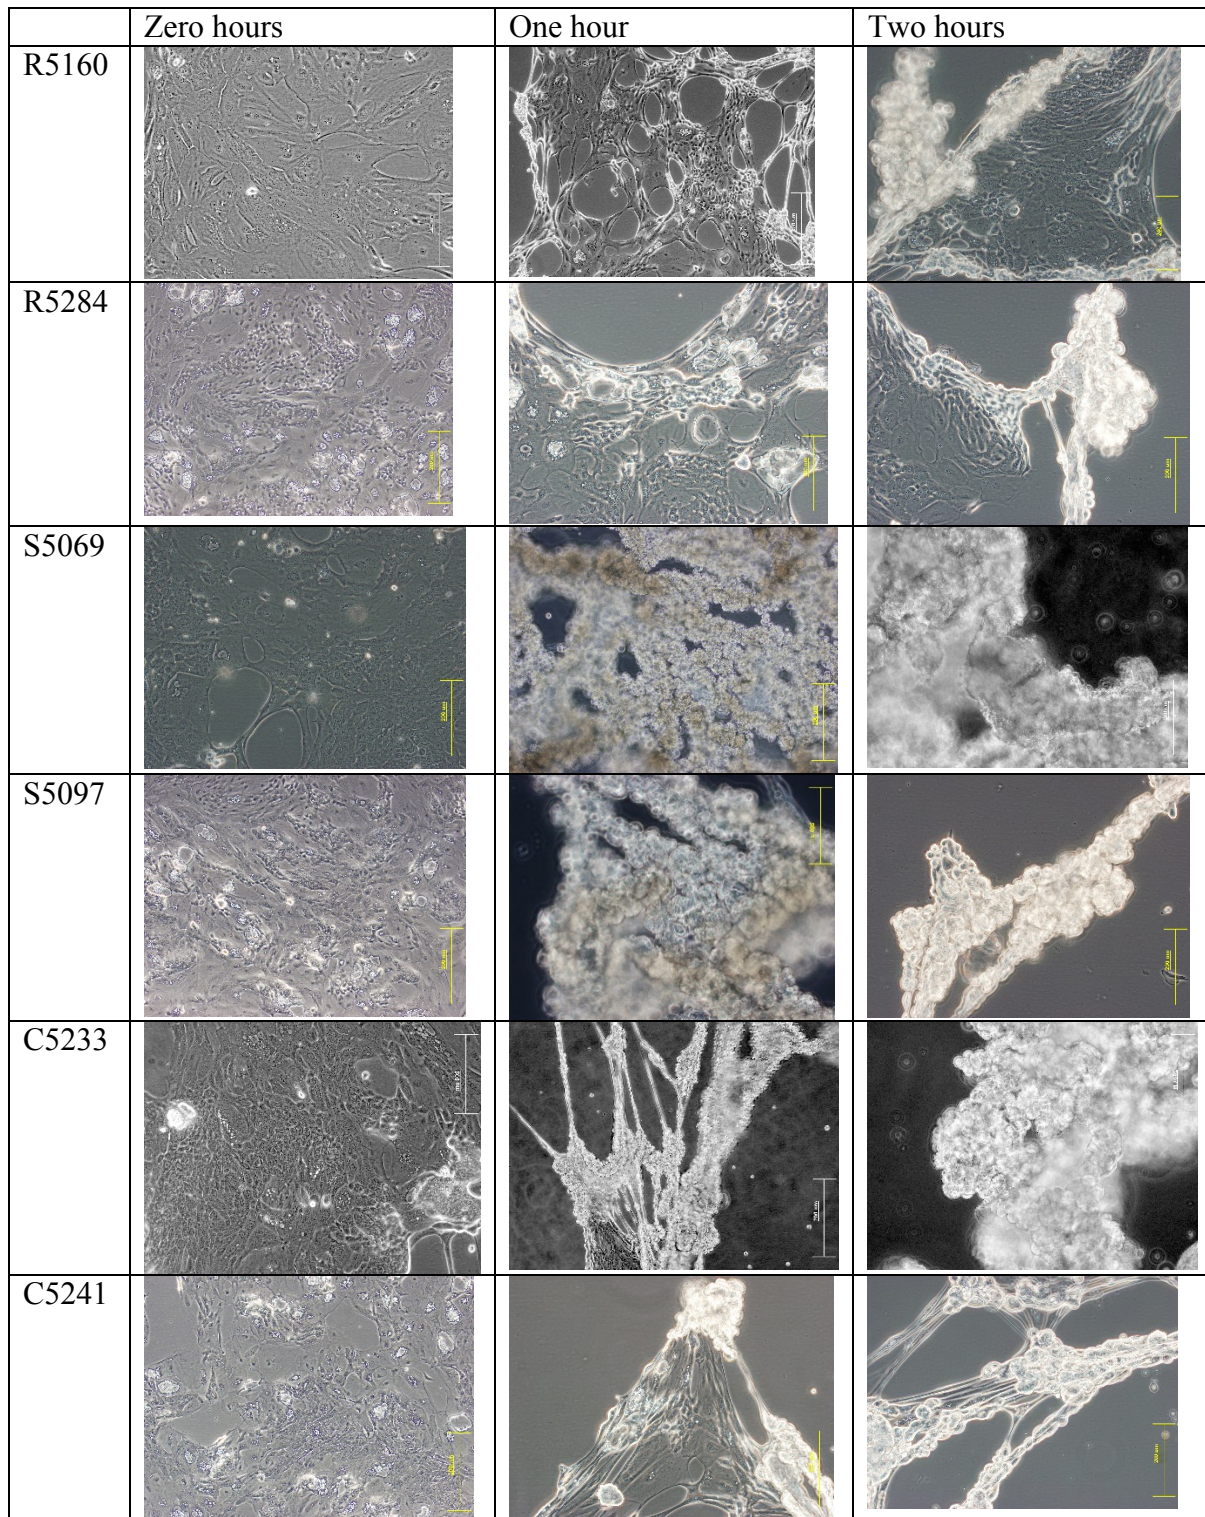

Supplement: Supplementary file 1 [file 1]
