# Supplementary material
Source: publisher figshare collection journal article supplement (https://tandf.figshare.com/articles/dataset/_/7011812)
Supplement: Supplementary file 2 [file 1]

Archive with 3 entries (3 files):
- tnzv_a_1515676_sm6233.pdf
- tnzv_a_1515676_sm6232.avi
- tnzv_a_1515676_sm6227.avi
